# Supplementary material for: Combined Analysis of the Chloroplast Genome and Transcriptome of the Antarctic Vascular Plant Deschampsia antarctica Desv
Source: PLoS One. 2014 Mar 19;9(3):e92501. doi: 10.1371/journal.pone.0092501 (PMC3960257; doi:10.1371/journal.pone.0092501)
Supplement: Table S4 — Repeat sequences in the Deschampsia antarctica chloroplast genome. (XLSX) [file pone.0092501.s005.xlsx]

## Sheet: Table S4
Table S4. Repeat sequences in the D. antarctica chloroplast genome
No.	bp	repeat1 start	repeat2 start	Type*		repeat1	location	repeat2	location
1	35	0	79916	P	IGS		rps19~psbA	IGS	rpl22~rps19
2	22	4490	4490	R	CDS		rps16	CDS	rps16
3	36	7584	43856	P	partly CDS		*trnS-GCU	partly CDS	`trnS-GGA
4	28	7585	11231	F	CDS		trnS-GCU	CDS	trnS-UGA
5	32	11227	43863	P	partly CDS		*trnS-UGA	partly CDS	*trnS-GGA
6	28	11231	43863	P	CDS		trnS-UGA	CDS	trnS-GGA
7	32	12598	35515	F	IGS		trnG-UCC~trnfM-CAU	IGS	trnR-UCU~rps14
8	35	12669	35405	F	CDS		trnfM-CAU	IGS	trnR-UCU~rps14
9	33	12685	35421	F	CDS		trnfM-CAU	IGS	trnR-UCU~rps14
10	37	12689	35425	F	CDS		trnfM-CAU	IGS	trnR-UCU~rps14
11	34	12815	35387	F	IGS		trnfM-CAU~trnT-GGU	IGS	trnR-UCU~rps14
12	30	12819	35391	F	IGS		trnfM-CAU~trnT-GGU	IGS	trnR-UCU~rps14
13	30	13762	13762	P	IGS		trnfM-CAU~trnT-GGU	IGS	trnfM-CAU~trnT-GGU
14	33	14330	88846	F	IGS		trnfM-CAU~trnT-GGU	IGS	rps7~rps12 exon2
15	33	14330	126433	P	IGS		trnfM-CAU~trnT-GGU	IGS	rps12 exon2~rps7
16	29	14334	88850	F	IGS		trnfM-CAU~trnT-GGU	IGS	rps7~rps12 exon2
17	29	14334	126433	P	IGS		trnfM-CAU~trnT-GGU	IGS	rps12 exon2~rps7
18	24	14339	88855	F	IGS		trnfM-CAU~trnT-GGU	IGS	rps7~rps12 exon2
19	24	14339	126433	P	IGS		trnfM-CAU~trnT-GGU	IGS	rps12 exon2~rps7
20	31	14779	45064	P	CDS		trnT-GGU	partly CDS	*trnT-GGU
21	18	15289	15289	P	IGS		trnT-GGU~trnE-UUC	IGS	trnT-GGU~trnE-UUC
22	30	26365	26419	F	CDS		rpoC2	CDS	rpoC2
23	31	26387	26606	F	CDS		rpoC2	CDS	rpoC2
24	31	26397	26541	F	CDS		rpoC2	CDS	rpoC2
25	40	26405	26453	F	CDS		rpoC2	CDS	rpoC2
26	41	26409	26457	F	CDS		rpoC2	CDS	rpoC2
27	39	26473	26548	F	CDS		rpoC2	CDS	rpoC2
28	27	26494	26515	F	CDS		rpoC2	CDS	rpoC2
29	34	26535	26610	F	CDS		rpoC2	CDS	rpoC2
30	28	26541	26616	F	CDS		rpoC2	CDS	rpoC2
31	32	26590	26656	F	CDS		rpoC2	CDS	rpoC2
32	33	26596	26662	F	CDS		rpoC2	CDS	rpoC2
33	42	37445	39669	F	CDS		psaB	CDS	psaA
34	38	37449	39673	F	CDS		psaB	CDS	psaA
35	36	42356	89517	F	intron		ycf3	IGS	rps12 exon2~trnV-GAC
36	36	42356	125759	P	intron		ycf3	IGS	trnV-GAC~rps12 exon2
37	19	46886	121089	P	CDS		trnF-GAA	CDS	trnA-UGC
38	58	53267	53325	F	IGS		atpB~rbcL	IGS	atpB~rbcL
39	286	55578	133036	F	IGS		rbcL~psaI	CDS	rpl23
40	286	55578	81990	P	IGS		rbcL~psaI	IGS	rpl2~rpl23
41	272	55592	133050	F	IGS		rbcL~psaI	CDS	rpl23
42	272	55592	81990	P	IGS		rbcL~psaI	IGS	rpl2~rpl23
43	47	55817	133275	F	IGS		rbcL~psaI	CDS	rpl23
44	47	55817	81990	P	IGS		rbcL~psaI	IGS	rpl2~rpl23
45	44	56555	56555	P	IGS		rbcL~psaI	IGS	rbcL~psaI
46	18	60321	60345	P	IGS		petA~psbJ	IGS	petA~psbJ
47	24	61122	61122	R	IGS		psbJ~psbL	IGS	psbJ~psbL
48	28	62516	62530	F	IGS		psbE~petL	IGS	psbE~petL
49	23	62521	62535	F	IGS		psbE~petL	IGS	psbE~petL
50	37	65157	65262	F	CDS		rps18	CDS	rps18
51	40	65171	65213	F	CDS		rps18	CDS	rps18
52	40	65178	65220	F	CDS		rps18	CDS	rps18
53	37	65185	65227	F	CDS		rps18	CDS	rps18
54	36	65192	65213	F	CDS		rps18	CDS	rps18
55	31	65208	65229	F	CDS		rps18	CDS	rps18
56	34	65213	65234	F	CDS		rps18	CDS	rps18
57	31	65229	65250	F	CDS		rps18	CDS	rps18
58	34	65244	65265	F	CDS		rps18	CDS	rps18
59	30	65248	65269	F	CDS		rps18	CDS	rps18
60	36	65621	65627	P	CDS		rps18	CDS	rps18
61	30	65627	65627	P	CDS		rps18	CDS	rps18
62	35	75720	75738	F	CDS		infA	CDS	infA
63	19	84076	131217	C	IGS		trnI-CAU~trnL-CAA	IGS	trnL-CAA~trnI-CAU
64	30	86517	128765	F	intron		ndhB	intron	ndhB
65	30	86517	86517	P	intron		ndhB	intron	ndhB
66	18	93263	99262	P	IGS		rrn16~trnI-GAU	IGS	trnR-AGG~trnN-GUU
67	60	100572	114681	F	IGS		trnN-GUU~rps15	IGS	rps15~trnN-GUU
68	60	100572	100572	P	IGS		trnN-GUU~rps15	IGS	trnN-GUU~rps15
69	29	100603	114712	F	IGS		trnN-GUU~rps15	IGS	rps15~trnN-GUU
70	19	100823	114471	C	CDS		rps15	CDS	rps15
71	47	103806	103806	P	IGS		ndhF~rpl32	IGS	ndhF~rpl32
72	24	104946	104976	P	IGS		rpl32~trnL-UAG	IGS	rpl32~trnL-UAG
73	32	106072	106072	P	CDS		ccsA	CDS	ccsA
74	60	114681	114681	P	IGS		rps15~trnN-GUU	IGS	rps15~trnN-GUU
75	30	128765	128765	P	intron		ndhB	intron	ndhB
* F: forward, P: palindromic, R:reverse, CDS: coding sequences, IGS: intergenic sequences
